# Supplementary material for: Linking Alpine deformation in the Aar Massif basement and its cover units – the case of the Jungfrau–Eiger mountains (Central Alps, Switzerland)
Source: Copernicus journal article supplement (doi:10.5194/se-9-1099-2018), 2018-09-25
Supplement: Supplementary file 1 [file se-9-1099-2018-supplement.zip]

Archive with 3 entries (3 files):
- Supplement1.zip
- se-9-1099-2018-supplement-title-page.pdf
- Supplement2.zip
