# Supplementary material for: Linking Alpine deformation in the Aar Massif basement and its cover units – the case of the Jungfrau–Eiger mountains (Central Alps, Switzerland)
Source: Copernicus journal article supplement (doi:10.5194/se-9-1099-2018), 2018-09-25
Supplement: Supplementary file 1 [file se-9-1099-2018-supplement.zip › se-9-1099-2018-supplement-title-page.pdf]

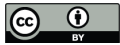

## *Supplement of*

# **Linking Alpine deformation in the Aar Massif basement and its cover units – the case of the Jungfrau–Eiger mountains (Central Alps, Switzerland)**

**David Mair et al.**

*Correspondence to:* David Mair ([david.mair@geo.unibe.ch](mailto:david.mair@geo.unibe.ch))

- [se-9-1099-2018-supplement-title-page.pdf](#)
- [Supplement1.zip](#)
- [Supplement2.zip](#)

The copyright of individual parts of the supplement might differ from the CC BY 4.0 License.
